# Supplementary material
Source: PubMed Central journal article supplement (PMC4058862)
Supplement: NIHMS591325-supplement-Supplementary_Figure_Table_S1.pdf [file NIHMS591325-supplement-Supplementary_Figure_Table_S1.pdf]

**Table S1. Regions of mouse genome (flagged region) that are enriched in input, affinity control and experimental ChIP.**

| <b>Chromosome</b> | <b>Peak start</b> | <b>Peak end</b> | <b>Peak width (bp)</b> | <b>In input</b> |
|-------------------|-------------------|-----------------|------------------------|-----------------|
| chr1              | 197067705         | 197068115       | 411                    | TRUE            |
| chr10             | 21862065          | 21862874        | 810                    | TRUE            |
| chr10             | 95540115          | 95540577        | 463                    | TRUE            |
| chr10             | 95540115          | 95540577        | 463                    | TRUE            |
| chr11             | 53953491          | 53954238        | 748                    | TRUE            |
| chr11             | 53953491          | 53954238        | 748                    | TRUE            |
| chr11             | 53953491          | 53954238        | 748                    | TRUE            |
| chr11             | 53953491          | 53954238        | 748                    | TRUE            |
| chr11             | 108872898         | 108873446       | 549                    | TRUE            |
| chr12             | 3109866           | 3110177         | 312                    | TRUE            |
| chr12             | 56701255          | 56701450        | 196                    | FALSE           |
| chr12             | 68160101          | 68160929        | 829                    | TRUE            |
| chr12             | 75904825          | 75905560        | 736                    | TRUE            |
| chr12             | 98299607          | 98300069        | 463                    | TRUE            |
| chr12             | 98299607          | 98300069        | 463                    | TRUE            |
| chr13             | 3372078           | 3372970         | 893                    | TRUE            |
| chr13             | 3372078           | 3372970         | 893                    | TRUE            |
| chr13             | 3372078           | 3372970         | 893                    | TRUE            |
| chr13             | 77578107          | 77578378        | 272                    | TRUE            |
| chr13             | 77578107          | 77578378        | 272                    | TRUE            |
| chr13             | 85266203          | 85267181        | 979                    | TRUE            |
| chr13             | 97960438          | 97960646        | 209                    | TRUE            |
| chr13             | 100560813         | 100561130       | 318                    | TRUE            |
| chr13             | 100560813         | 100561130       | 318                    | TRUE            |
| chr13             | 100560813         | 100561130       | 318                    | TRUE            |
| chr15             | 72399062          | 72399239        | 178                    | FALSE           |
| chr15             | 74916570          | 74917534        | 965                    | TRUE            |
| chr15             | 74916570          | 74917534        | 965                    | TRUE            |
| chr15             | 74916570          | 74917534        | 965                    | TRUE            |
| chr15             | 74916570          | 74917534        | 965                    | TRUE            |
| chr15             | 74916570          | 74917534        | 965                    | TRUE            |
| chr15             | 74916570          | 74917534        | 965                    | TRUE            |
| chr15             | 74916570          | 74917534        | 965                    | TRUE            |
| chr15             | 74916570          | 74917534        | 965                    | TRUE            |
| chr15             | 77950232          | 77950459        | 228                    | FALSE           |
| chr16             | 10975106          | 10975426        | 321                    | TRUE            |
| chr16             | 35981645          | 35981897        | 253                    | TRUE            |
| chr16             | 35981645          | 35981897        | 253                    | TRUE            |
| chr16             | 57391552          | 57391833        | 282                    | TRUE            |
| chr16             | 57391552          | 57391833        | 282                    | TRUE            |

| <b>Chromosome</b> | <b>Peak start</b> | <b>Peak end</b> | <b>Peak width (bp)</b> | <b>In input</b> |
|-------------------|-------------------|-----------------|------------------------|-----------------|
| chr16             | 98244219          | 98244413        | 195                    | TRUE            |
| chr16             | 98244219          | 98244413        | 195                    | TRUE            |
| chr16             | 98244219          | 98244413        | 195                    | TRUE            |
| chr17             | 36368168          | 36368596        | 429                    | TRUE            |
| chr17             | 36368168          | 36368596        | 429                    | TRUE            |
| chr17             | 39979904          | 39985817        | 5914                   | TRUE            |
| chr17             | 39979904          | 39985817        | 5914                   | TRUE            |
| chr17             | 39979904          | 39985817        | 5914                   | TRUE            |
| chr17             | 39979904          | 39985817        | 5914                   | TRUE            |
| chr18             | 3005011           | 3006236         | 1226                   | TRUE            |
| chr18             | 3005011           | 3006236         | 1226                   | TRUE            |
| chr18             | 3005011           | 3006236         | 1226                   | TRUE            |
| chr18             | 3005011           | 3006236         | 1226                   | TRUE            |
| chr18             | 3005011           | 3006236         | 1226                   | TRUE            |
| chr18             | 3005011           | 3006236         | 1226                   | TRUE            |
| chr18             | 3005011           | 3006236         | 1226                   | TRUE            |
| chr18             | 3005011           | 3006236         | 1226                   | TRUE            |
| chr18             | 3638812           | 3639187         | 376                    | TRUE            |
| chr18             | 40467658          | 40468068        | 411                    | TRUE            |
| chr18             | 56099081          | 56099335        | 255                    | TRUE            |
| chr18             | 82390528          | 82390698        | 171                    | TRUE            |
| chr19             | 4989120           | 4989292         | 173                    | FALSE           |
| chr19             | 42330454          | 42330685        | 232                    | FALSE           |
| chr19             | 45724406          | 45724768        | 363                    | TRUE            |
| chr19             | 45724406          | 45724768        | 363                    | TRUE            |
| chr19             | 61275555          | 61275792        | 238                    | TRUE            |
| chr2              | 22444012          | 22446095        | 2084                   | TRUE            |
| chr2              | 22600333          | 22600516        | 184                    | TRUE            |
| chr2              | 69193555          | 69193763        | 209                    | TRUE            |
| chr2              | 79294386          | 79294591        | 206                    | FALSE           |
| chr2              | 98502333          | 98503197        | 865                    | TRUE            |
| chr2              | 98502333          | 98503197        | 865                    | TRUE            |
| chr2              | 98502333          | 98503197        | 865                    | TRUE            |
| chr2              | 98502333          | 98503197        | 865                    | TRUE            |
| chr2              | 98503753          | 98504307        | 555                    | TRUE            |
| chr2              | 98506340          | 98507525        | 1186                   | TRUE            |
| chr2              | 98506340          | 98507525        | 1186                   | TRUE            |
| chr2              | 152858042         | 152858252       | 211                    | FALSE           |
| chr2              | 164794060         | 164794160       | 101                    | FALSE           |
| chr2              | 181652014         | 181652818       | 805                    | TRUE            |
| chr2              | 181652014         | 181652818       | 805                    | TRUE            |
| chr2              | 181652014         | 181652818       | 805                    | TRUE            |
| chr2              | 181665130         | 181665729       | 600                    | TRUE            |

| <b>Chromosome</b> | <b>Peak start</b> | <b>Peak end</b> | <b>Peak width (bp)</b> | <b>In input</b> |
|-------------------|-------------------|-----------------|------------------------|-----------------|
| chr2              | 181665130         | 181665729       | 600                    | TRUE            |
| chr3              | 5860569           | 5860868         | 300                    | TRUE            |
| chr3              | 5860569           | 5860868         | 300                    | TRUE            |
| chr3              | 8245754           | 8246603         | 850                    | TRUE            |
| chr3              | 8245754           | 8246603         | 850                    | TRUE            |
| chr3              | 8245754           | 8246603         | 850                    | TRUE            |
| chr3              | 56379314          | 56379744        | 431                    | TRUE            |
| chr3              | 56379314          | 56379744        | 431                    | TRUE            |
| chr3              | 56379314          | 56379744        | 431                    | TRUE            |
| chr3              | 56379314          | 56379744        | 431                    | TRUE            |
| chr3              | 99785033          | 99785316        | 284                    | TRUE            |
| chr4              | 3016622           | 3018387         | 1766                   | TRUE            |
| chr4              | 3016622           | 3018387         | 1766                   | TRUE            |
| chr4              | 3016622           | 3018387         | 1766                   | TRUE            |
| chr4              | 21639564          | 21639635        | 72                     | FALSE           |
| chr4              | 28104023          | 28104197        | 175                    | TRUE            |
| chr4              | 64158840          | 64159150        | 311                    | TRUE            |
| chr4              | 64158840          | 64159150        | 311                    | TRUE            |
| chr4              | 70039090          | 70039358        | 269                    | TRUE            |
| chr4              | 79648396          | 79651153        | 2758                   | TRUE            |
| chr5              | 7276770           | 7277009         | 240                    | TRUE            |
| chr5              | 115372382         | 115372654       | 273                    | TRUE            |
| chr5              | 115372382         | 115372654       | 273                    | TRUE            |
| chr5              | 115372382         | 115372654       | 273                    | TRUE            |
| chr5              | 147072509         | 147072968       | 460                    | TRUE            |
| chr5              | 147072509         | 147072968       | 460                    | TRUE            |
| chr6              | 3151399           | 3151612         | 214                    | TRUE            |
| chr6              | 9840054           | 9840216         | 163                    | TRUE            |
| chr6              | 48071227          | 48071390        | 164                    | TRUE            |
| chr6              | 79768041          | 79768360        | 320                    | TRUE            |
| chr6              | 79768041          | 79768360        | 320                    | TRUE            |
| chr6              | 103598999         | 103599287       | 289                    | TRUE            |
| chr6              | 121423177         | 121423379       | 203                    | FALSE           |
| chr6              | 136752829         | 136753076       | 248                    | TRUE            |
| chr7              | 7230792           | 7230996         | 205                    | TRUE            |
| chr7              | 88638379          | 88638443        | 65                     | FALSE           |
| chr7              | 89920145          | 89920590        | 446                    | TRUE            |
| chr7              | 118940974         | 118941162       | 189                    | TRUE            |
| chr8              | 14072623          | 14072825        | 203                    | FALSE           |
| chr8              | 19784504          | 19784991        | 488                    | TRUE            |
| chr8              | 20020262          | 20020528        | 267                    | TRUE            |
| chr8              | 24205893          | 24206328        | 436                    | TRUE            |

| <b>Chromosome</b> | <b>Peak start</b> | <b>Peak end</b> | <b>Peak width (bp)</b> | <b>In input</b> |
|-------------------|-------------------|-----------------|------------------------|-----------------|
| chr8              | 24205893          | 24206328        | 436                    | TRUE            |
| chr8              | 127317183         | 127317380       | 198                    | FALSE           |
| chr9              | 2999946           | 3001152         | 1207                   | TRUE            |
| chr9              | 3002908           | 3003075         | 168                    | TRUE            |
| chr9              | 3005825           | 3006009         | 185                    | TRUE            |
| chr9              | 3015212           | 3015406         | 195                    | TRUE            |
| chr9              | 3015644           | 3015808         | 165                    | TRUE            |
| chr9              | 3016025           | 3016407         | 383                    | TRUE            |
| chr9              | 3018714           | 3019517         | 804                    | TRUE            |
| chr9              | 3025313           | 3026171         | 859                    | FALSE           |
| chr9              | 3026262           | 3027857         | 1596                   | TRUE            |
| chr9              | 3030097           | 3030318         | 222                    | TRUE            |
| chr9              | 3031825           | 3032769         | 945                    | TRUE            |
| chr9              | 3035658           | 3036643         | 986                    | TRUE            |
| chr9              | 15123942          | 15124316        | 375                    | TRUE            |
| chr9              | 24346388          | 24346665        | 278                    | TRUE            |
| chr9              | 24346388          | 24346665        | 278                    | TRUE            |
| chr9              | 24346388          | 24346665        | 278                    | TRUE            |
| chr9              | 24549507          | 24549705        | 199                    | TRUE            |
| chr9              | 35112718          | 35113179        | 462                    | TRUE            |
| chr9              | 86916747          | 86916747        | 1                      | FALSE           |
| chr9              | 108729231         | 108729531       | 301                    | FALSE           |
| chr9              | 123371015         | 123371328       | 314                    | TRUE            |
| chr9              | 123782164         | 123782369       | 206                    | TRUE            |
| chrX              | 73843981          | 73844520        | 540                    | TRUE            |
| chrX              | 73843981          | 73844520        | 540                    | TRUE            |
| chrX              | 109484283         | 109484882       | 600                    | TRUE            |
| chrX              | 109484283         | 109484882       | 600                    | TRUE            |
| chrX              | 139917495         | 139917705       | 211                    | TRUE            |
| chrX              | 139917495         | 139917705       | 211                    | TRUE            |
| chrY              | 2765733           | 2765870         | 138                    | FALSE           |

Most of these genomic sites hereafter designated as flagged regions are also enriched in other publically available control and experimental ChIP datasets. True indicates whether the given genomic locus is equally enriched in input sample. False indicates that the region is enriched in affinity based control and experimental ChIP but not in the input genomic DNA.
