# Supplementary material
Source: PubMed Central journal article supplement (PMC4058862)
Supplement: NIHMS591325-supplement-Supplementary_Text.pdf [file NIHMS591325-supplement-Supplementary_Text.pdf]

# Chromatin Tandem Affinity Purification Sequencing (ChTAP-Seq)

Vahab D Soleimani, Gareth A Palidwor, Theodore J Perkins and Michael A Rudnicki.

## SUPPLEMENTARY INFORMATION

### Caption to figures

**Figure S1. Read distribution in ChIP-seq, control and input sample.** (a) H3K4me3 ChIP-seq (GSM798328), control (GSM798324) and input reads (GSM923574) were obtained from UCSC ENCODE DCC, available from the NCBI database. The genome was divided into 500 bp windows and, for each data set; the number of reads per window was calculated as described in Figure 3a. (b-c) Correlation analysis between read distribution of input DNA with H3K4me3 ChIP-seq and IgG control ChIP (mock ChIP) shows that IgG ChIP-seq signal is more correlated to the H3K4me3 ChIP-seq than the input DNA. Correlation analysis was performed as described in Fig. 3-4.

**Figure S2. Representative screenshot of flagged genomic regions enriched in input, control and ChIP-seq datasets.** Many of these genomic regions are enriched in all datasets including those generated by ENCODE. See table S1 for a complete list of these genomic regions.

### Supplementary Discussion

**Inferring the composition of ChIP-seq signal.** Discrimination of putative transcription factor-binding sites (true peaks) from a significant amount of noise inherent in ChIP-seq data is a critical initial step that can affect the outcome of all downstream data analysis. In recent years, various peak calling algorithms have been developed<sup>1-5</sup>. To adjust for the inherent noise in ChIP-seq data, many studies have used a generic null model of the read distribution for control such as a Poisson or negative binomial distribution, to calculate p-values and false discovery rates (FDR)<sup>1,2,6</sup>. Analysis of ChTAP data, which uses identical affinity reagents in the ChIP and the control experiment, challenges the notion that input DNA is an appropriate control to adjust for background noise. We have shown that using input DNA as a means to subtract background results in a significantly larger set of peaks compared to using a matching control ChIP. Importantly, the large set of extra peaks that are called when using input DNA for background subtraction show hallmarks of false positive peaks including low peak scores and no significant enrichment for the DNA motif to which the transcription factor of interest binds within the boundaries of these peaks (Fig. 6).

To adjust for background noise emanating from ChIP-seq data we have used reads from an empty vector – matching control experiment for background subtraction<sup>7,8</sup>. Consistent with previous observations<sup>9</sup> that read distributions in control (mock IP) experiments bear significant resemblance to genome wide read distributions of the actual ChIP, rather than input DNA libraries.

Comparative analysis using a linear regression model also indicates that the ChIP-seq signal contains a significant amount of control-like signal that cannot be captured by using input signal as control. To provide a quantitative estimate of the extent of noise in ChIP-seq data we: (1) analyzed the distribution of reads in 500 bp windows for a Poisson model and various data sets, and (2) correlation/linear regression analysis of ChTAP-seq of ChIP-seq reads using control and input densities as independent variables. We first divided the mouse genome (mm9) into 500 bp windows (500 bp approximates the average length of the peaks identified in our ChTAP-seq datasets). We analyzed three datasets; transcription factor (experimental) ChTAP-seq, empty vector (control) ChTAP-seq and a sequenced input DNA library. We performed these analyses on a MyoD ChIP-seq dataset in myoblasts, a MyoD ChIP-seq dataset in myotubes, a Myf5 ChIP-seq dataset in myoblasts, and a Pax7 ChIP-seq dataset in myoblasts. For comparative purposes we extended this analysis to other ChIP-seq datasets generated by an independent group. We obtained ChIP-seq (GSM798328), control (GSM798324) and input reads (GSM923574) from UCSC ENCODE DCC, available from the NCBI database. For each dataset we counted the frequency of windows with 0, 1, 2, ..., 29 reads. In addition, we also combined all windows with  $\geq 30$  reads into one bin. To adjust for the differences in tag number among different dataset we normalized, the window counts to 10 million tags. We also computed the expected number of windows with 0, 1, 2, ...,  $\geq 30$  reads under a Poisson model (Fig. 3, Fig. S1).

Our data shows that the Poisson model is a poor fit to any of the real libraries (i.e., ChIP, Control, and the input DNA). The Poisson model attributes very low probability to even modestly enriched windows. The input DNA distribution is much broader than the Poisson distribution, with a peak around 4 reads per window, and an inflection point at 1 read per window (Fig. 3, Fig. S1). This is most likely due to the occurrence of windows with 0 reads, which are fairly common, at least in part because large regions of the genome are unmappable. The input DNA also includes some highly enriched windows, some of which may be mapping artifacts or bias in sequencing the input library, as described below in more detail. The control and the ChIP data appear quite similar for low numbers of reads ( $\leq 5$  per window) which are the most common kinds of windows (Fig. 3, Fig. S1). Interestingly, many genomic regions enriched in the input DNA library were equally enriched in all controls and ChIP-seq datasets. Furthermore, these regions were also enriched in the ENCODE datasets available from the UCSC genome browser (Fig. S2, Table S1). Consequently, we have flagged these artificially enriched regions and excluded them from all our downstream analysis.

To study how well the signals are correlated on a per-window basis we performed correlation analysis (Fig. 4, Fig. S1b). Our analysis shows that on a per-window basis the empty vector ChTAP-seq control data is better correlated with the actual transcription

factor ChTAP-seq data than is the input DNA (Fig. 4, Fig. S1b). The input DNA library also shows non-trivial but lower correlations with the actual transcription factor ChTAP-seq (Fig. 4). Thus, the total signal of a transcription factor (ChIP-seq signal) contains a substantial amount of non-specific noise.

To disassemble the transcription factor (in this case Pax7, MyoD and Myf5) ChTAP-seq signal into true signal versus noise we formulated the following linear model.  $TF\_Tags\_Normalized = w1 \times InputDNA\_Tags\_Normalized + w2 \times ChTAP-seq\_Control\_Tags\_Normalized$ , where  $w1$  denotes the weight of input and  $w2$  denotes the weight of empty vector ChTAP-seq (control). We normalized each dataset by subtracting the mean count from each window and divided it by the standard deviation. Therefore, the normalized tag counts per window have mean zero and standard deviation one. By applying this model to MyoD dataset we obtain

$$\begin{aligned} w1 & 0.2296 \quad (0.2288, 0.2303) \\ w2 & 0.5091 \quad (0.5083, 0.5098) \end{aligned}$$

where numbers inside the parenthesis indicate 95% confidence intervals. Importantly, this model shows that input DNA library as well as the empty vector ChTAP-seq control are both useful in predicting the total signal in the ChIP-seq data. However, the empty vector ChTAP-seq ( $w2 = 0.5091$ ) has a larger weight and much more predictive power than the input DNA ( $w1 = 0.2296$ ). By extending this analysis to publicly available ChIP-seq datasets from an independent laboratory we observed very similar pattern. Namely, that ChIP signal is more closely related to a mock ChIP (IgG ChIP) than the input (Fig. S1). Therefore, these analyses indicate that an affinity based matching control is more superior for the normalization of background noise in ChIP-seq data.

The alternative control commonly used to eliminate background noise in ChIP-seq is sonicated input DNA. Although such input DNA libraries have been shown to have underlying signals corresponding to gene expression, mappability and chromatin structure<sup>10</sup>; the reads tend to be rather smoothly distributed with far less localized enrichment compared to treatment ChIP-seq data or an actual control ChIP-seq.

Whilst the signal present in the input DNA library is not trivial, the empty vector control shows a much greater similarity to the treatment ChTAP-seq libraries (Fig. 3-4). However, tag distribution in sonicated DNA library (input) is also non-uniformly distributed and showed some bias towards transcription start sites (TSS) (Fig. 5). This kind of bias in high throughput DNA sequencing experiments has been reported previously<sup>11,12</sup> and may be related to GC compositional bias around TSS. Previous studies have shown that eukaryotic transcription start sites (TSSs) are associated with elevated GC content<sup>13</sup>. The GC content of the TSS may also be due to the large overlap of TSSs with CpG islands, as most mouse and human TSSs have been shown to be associated with CpG islands<sup>14</sup>. A direct correlation between enrichment of reads in the input DNA library and the GC content around the TSS of ENSEMBL genes (known protein coding genes) (Fig. 5) confirms the above observations. Therefore, some enrichment around TSS and other genomic features may be independent of

immunoprecipitation steps and may be due to structural differences in the genome, resulting in biased shearing of DNA, or due to PCR bias during library construction during high throughput sequencing.

In conclusion, ChIP-seq signals contain a significant amount of noise. While input DNA is widely used for the subtraction of background noise, and can eliminate some noise emanating from GC compositional bias, a significant amount of non-specific signal in the ChIP-seq data is not amenable to normalization by using input DNA. By using ChTAP-seq we first provide an efficient alternative to the traditional ChIP, and second, by using identical affinity reagents, we dissect the ChIP-seq signal into real signal versus background noise. Our methodology of dealing with background noise in ChIP-seq data is broadly applicable to the analysis of all ChIP-seq data.

#### References Cited:

- 1 Tuteja, G., White, P., Schug, J. & Kaestner, K. H. Extracting transcription factor targets from ChIP-Seq data. *Nucleic acids research* **37**, e113, doi:10.1093/nar/gkp536 (2009).
- 2 Zhang, Y. *et al.* Model-based analysis of ChIP-Seq (MACS). *Genome biology* **9**, R137, doi:10.1186/gb-2008-9-9-r137 (2008).
- 3 Feng, X., Grossman, R. & Stein, L. PeakRanger: a cloud-enabled peak caller for ChIP-seq data. *BMC bioinformatics* **12**, 139, doi:10.1186/1471-2105-12-139 (2011).
- 4 Xu, J. & Zhang, Y. A generalized linear model for peak calling in ChIP-Seq data. *Journal of computational biology : a journal of computational molecular cell biology* **19**, 826-838, doi:10.1089/cmb.2012.0023 (2012).
- 5 Spyrou, C., Stark, R., Lynch, A. G. & Tavaré, S. BayesPeak: Bayesian analysis of ChIP-seq data. *BMC bioinformatics* **10**, 299, doi:10.1186/1471-2105-10-299 (2009).
- 6 Diaz, A., Park, K., Lim, D. A. & Song, J. S. Normalization, bias correction, and peak calling for ChIP-seq. *Statistical applications in genetics and molecular biology* **11**, Article 9, doi:10.1515/1544-6115.1750 (2012).
- 7 Soleimani, V. D. *et al.* Transcriptional dominance of Pax7 in adult myogenesis is due to high-affinity recognition of homeodomain motifs. *Developmental cell* **22**, 1208-1220, doi:10.1016/j.devcel.2012.03.014 (2012).
- 8 Soleimani, V. D. *et al.* Snail regulates MyoD binding-site occupancy to direct enhancer switching and differentiation-specific transcription in myogenesis. *Molecular cell* **47**, 457-468, doi:10.1016/j.molcel.2012.05.046 (2012).
- 9 Landt, S. G. *et al.* ChIP-seq guidelines and practices of the ENCODE and modENCODE consortia. *Genome research* **22**, 1813-1831, doi:10.1101/gr.136184.111 (2012).
- 10 Fullwood, M. J. *et al.* An oestrogen-receptor-alpha-bound human chromatin interactome. *Nature* **462**, 58-64, doi:10.1038/nature08497 (2009).

- 11 Dohm, J. C., Lottaz, C., Borodina, T. & Himmelbauer, H. Substantial biases in ultra-short read data sets from high-throughput DNA sequencing. *Nucleic acids research* **36**, e105, doi:10.1093/nar/gkn425 (2008).
- 12 Vega, V. B., Cheung, E., Palanisamy, N. & Sung, W. K. Inherent signals in sequencing-based Chromatin-ImmunoPrecipitation control libraries. *PloS one* **4**, e5241, doi:10.1371/journal.pone.0005241 (2009).
- 13 Fujimori, S., Washio, T. & Tomita, M. GC-compositional strand bias around transcription start sites in plants and fungi. *BMC genomics* **6**, 26, doi:10.1186/1471-2164-6-26 (2005).
- 14 Bajic, V. B. *et al.* Mice and men: their promoter properties. *PLoS genetics* **2**, e54, doi:10.1371/journal.pgen.0020054 (2006).

# Figure S1

**a**

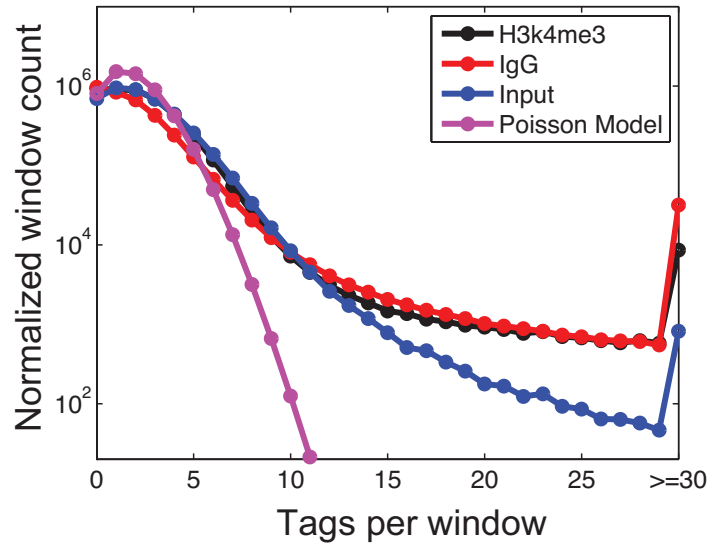

**b**

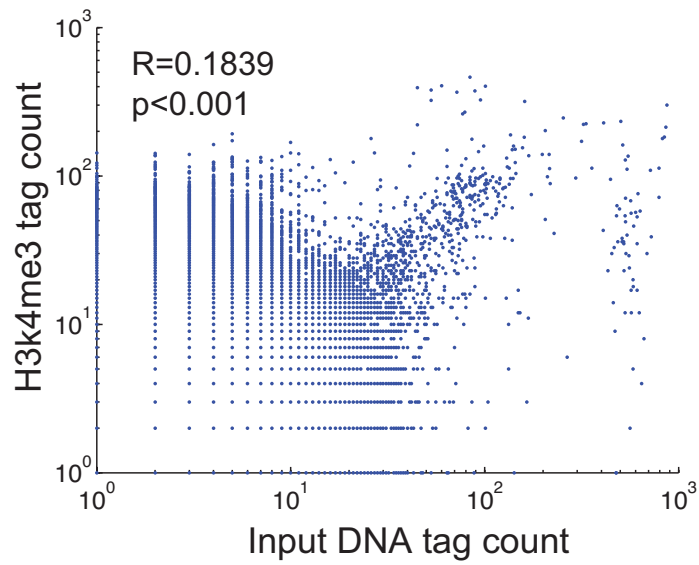

**c**

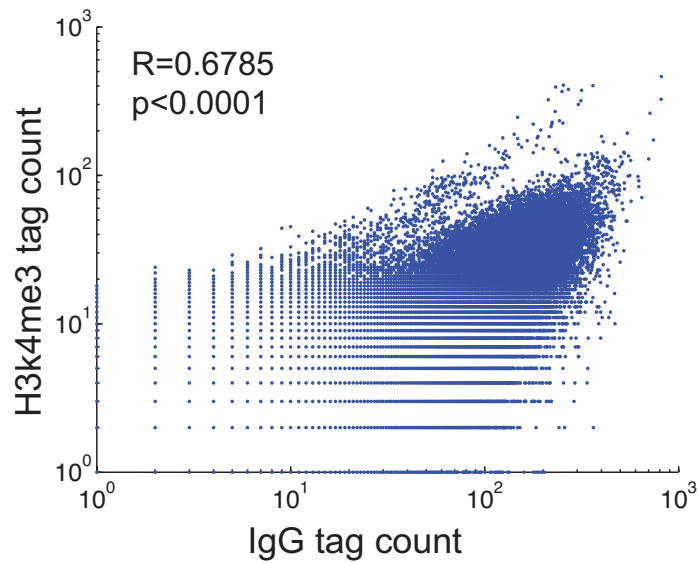

# Figure S2

Muscle cells (ChIP-seq peaks)

ENCODE project (ChIP-seq peaks) various tissues

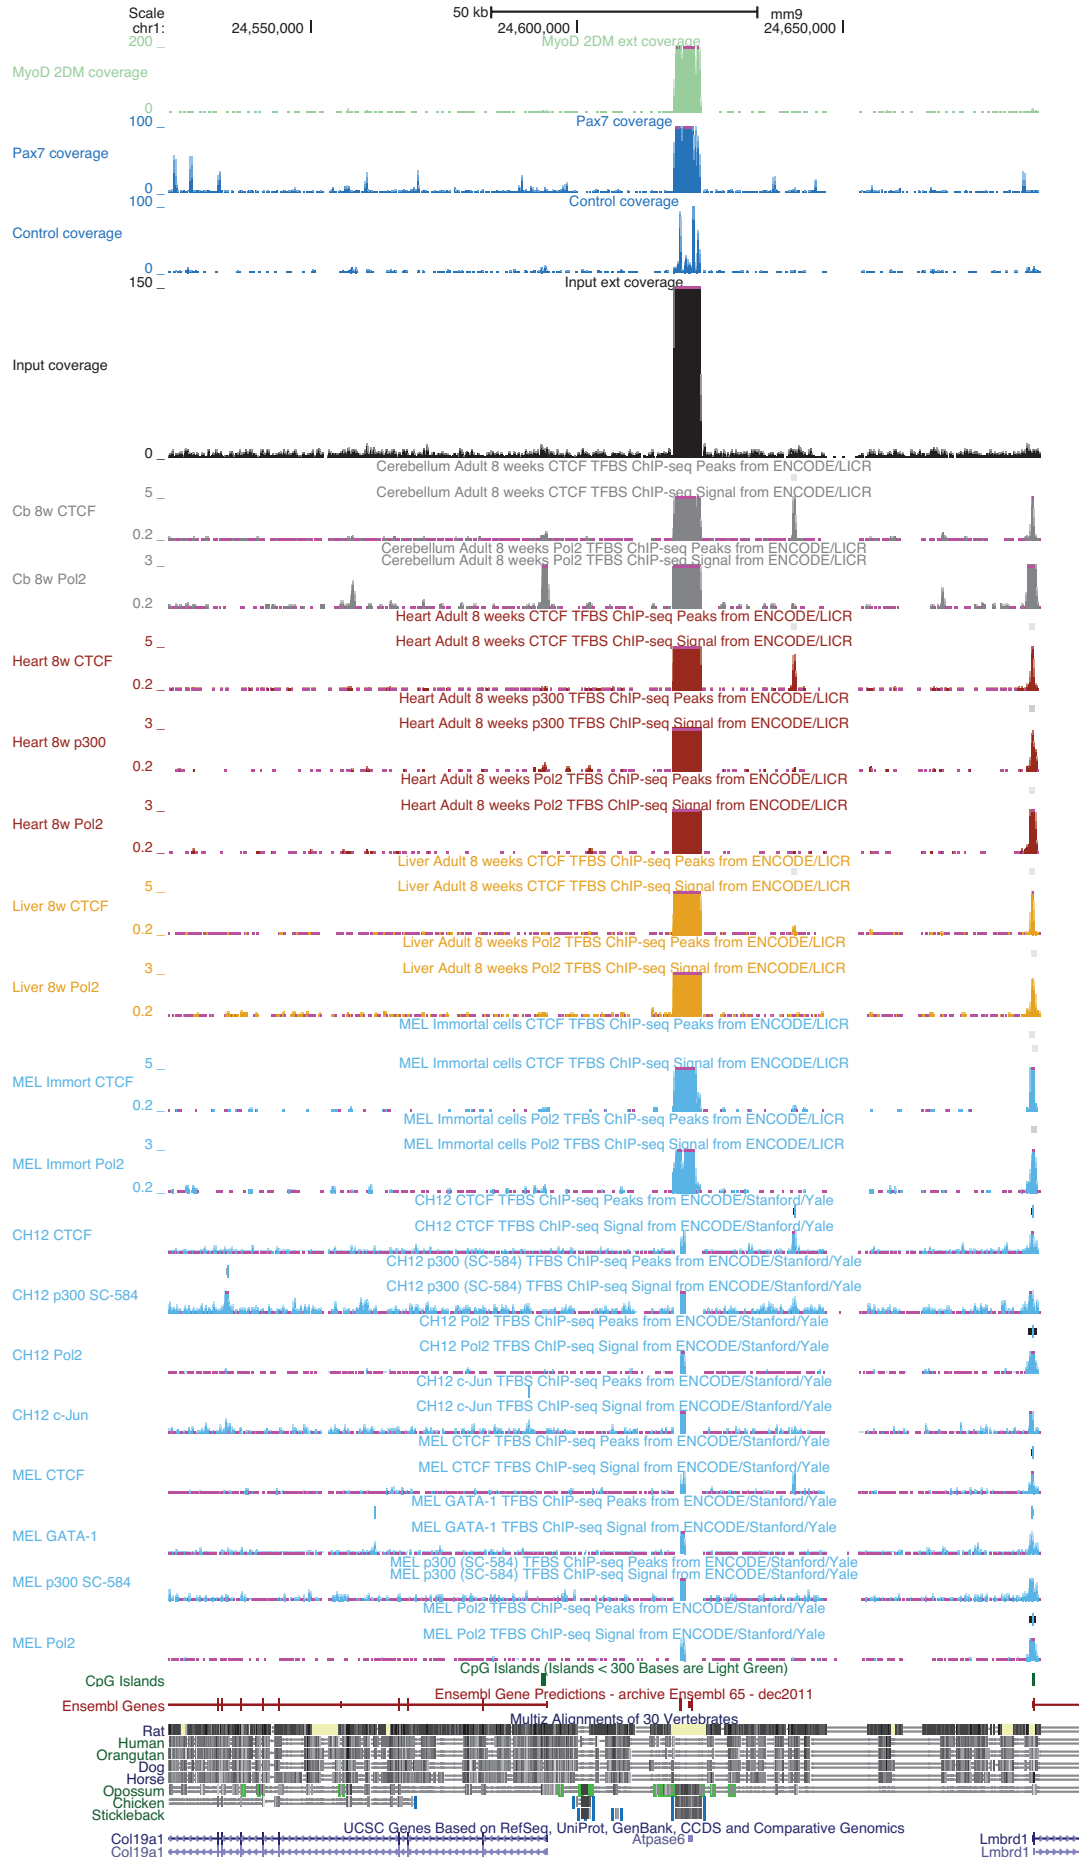

**Table S1. Regions of mouse genome (flagged region) that are enriched in input, affinity control and experimental ChIP.**

| <b>Chromosome</b> | <b>Peak start</b> | <b>Peak end</b> | <b>Peak width (bp)</b> | <b>In input</b> |
|-------------------|-------------------|-----------------|------------------------|-----------------|
| chr1              | 197067705         | 197068115       | 411                    | TRUE            |
| chr10             | 21862065          | 21862874        | 810                    | TRUE            |
| chr10             | 95540115          | 95540577        | 463                    | TRUE            |
| chr10             | 95540115          | 95540577        | 463                    | TRUE            |
| chr11             | 53953491          | 53954238        | 748                    | TRUE            |
| chr11             | 53953491          | 53954238        | 748                    | TRUE            |
| chr11             | 53953491          | 53954238        | 748                    | TRUE            |
| chr11             | 53953491          | 53954238        | 748                    | TRUE            |
| chr11             | 108872898         | 108873446       | 549                    | TRUE            |
| chr12             | 3109866           | 3110177         | 312                    | TRUE            |
| chr12             | 56701255          | 56701450        | 196                    | FALSE           |
| chr12             | 68160101          | 68160929        | 829                    | TRUE            |
| chr12             | 75904825          | 75905560        | 736                    | TRUE            |
| chr12             | 98299607          | 98300069        | 463                    | TRUE            |
| chr12             | 98299607          | 98300069        | 463                    | TRUE            |
| chr13             | 3372078           | 3372970         | 893                    | TRUE            |
| chr13             | 3372078           | 3372970         | 893                    | TRUE            |
| chr13             | 3372078           | 3372970         | 893                    | TRUE            |
| chr13             | 77578107          | 77578378        | 272                    | TRUE            |
| chr13             | 77578107          | 77578378        | 272                    | TRUE            |
| chr13             | 85266203          | 85267181        | 979                    | TRUE            |
| chr13             | 97960438          | 97960646        | 209                    | TRUE            |
| chr13             | 100560813         | 100561130       | 318                    | TRUE            |
| chr13             | 100560813         | 100561130       | 318                    | TRUE            |
| chr13             | 100560813         | 100561130       | 318                    | TRUE            |
| chr15             | 72399062          | 72399239        | 178                    | FALSE           |
| chr15             | 74916570          | 74917534        | 965                    | TRUE            |
| chr15             | 74916570          | 74917534        | 965                    | TRUE            |
| chr15             | 74916570          | 74917534        | 965                    | TRUE            |
| chr15             | 74916570          | 74917534        | 965                    | TRUE            |
| chr15             | 74916570          | 74917534        | 965                    | TRUE            |
| chr15             | 74916570          | 74917534        | 965                    | TRUE            |
| chr15             | 74916570          | 74917534        | 965                    | TRUE            |
| chr15             | 74916570          | 74917534        | 965                    | TRUE            |
| chr15             | 77950232          | 77950459        | 228                    | FALSE           |
| chr16             | 10975106          | 10975426        | 321                    | TRUE            |
| chr16             | 35981645          | 35981897        | 253                    | TRUE            |
| chr16             | 35981645          | 35981897        | 253                    | TRUE            |
| chr16             | 57391552          | 57391833        | 282                    | TRUE            |
| chr16             | 57391552          | 57391833        | 282                    | TRUE            |



| <b>Chromosome</b> | <b>Peak start</b> | <b>Peak end</b> | <b>Peak width (bp)</b> | <b>In input</b> |
|-------------------|-------------------|-----------------|------------------------|-----------------|
| chr16             | 98244219          | 98244413        | 195                    | TRUE            |
| chr16             | 98244219          | 98244413        | 195                    | TRUE            |
| chr16             | 98244219          | 98244413        | 195                    | TRUE            |
| chr17             | 36368168          | 36368596        | 429                    | TRUE            |
| chr17             | 36368168          | 36368596        | 429                    | TRUE            |
| chr17             | 39979904          | 39985817        | 5914                   | TRUE            |
| chr17             | 39979904          | 39985817        | 5914                   | TRUE            |
| chr17             | 39979904          | 39985817        | 5914                   | TRUE            |
| chr17             | 39979904          | 39985817        | 5914                   | TRUE            |
| chr18             | 3005011           | 3006236         | 1226                   | TRUE            |
| chr18             | 3005011           | 3006236         | 1226                   | TRUE            |
| chr18             | 3005011           | 3006236         | 1226                   | TRUE            |
| chr18             | 3005011           | 3006236         | 1226                   | TRUE            |
| chr18             | 3005011           | 3006236         | 1226                   | TRUE            |
| chr18             | 3005011           | 3006236         | 1226                   | TRUE            |
| chr18             | 3005011           | 3006236         | 1226                   | TRUE            |
| chr18             | 3005011           | 3006236         | 1226                   | TRUE            |
| chr18             | 3638812           | 3639187         | 376                    | TRUE            |
| chr18             | 40467658          | 40468068        | 411                    | TRUE            |
| chr18             | 56099081          | 56099335        | 255                    | TRUE            |
| chr18             | 82390528          | 82390698        | 171                    | TRUE            |
| chr19             | 4989120           | 4989292         | 173                    | FALSE           |
| chr19             | 42330454          | 42330685        | 232                    | FALSE           |
| chr19             | 45724406          | 45724768        | 363                    | TRUE            |
| chr19             | 45724406          | 45724768        | 363                    | TRUE            |
| chr19             | 61275555          | 61275792        | 238                    | TRUE            |
| chr2              | 22444012          | 22446095        | 2084                   | TRUE            |
| chr2              | 22600333          | 22600516        | 184                    | TRUE            |
| chr2              | 69193555          | 69193763        | 209                    | TRUE            |
| chr2              | 79294386          | 79294591        | 206                    | FALSE           |
| chr2              | 98502333          | 98503197        | 865                    | TRUE            |
| chr2              | 98502333          | 98503197        | 865                    | TRUE            |
| chr2              | 98502333          | 98503197        | 865                    | TRUE            |
| chr2              | 98502333          | 98503197        | 865                    | TRUE            |
| chr2              | 98503753          | 98504307        | 555                    | TRUE            |
| chr2              | 98506340          | 98507525        | 1186                   | TRUE            |
| chr2              | 98506340          | 98507525        | 1186                   | TRUE            |
| chr2              | 152858042         | 152858252       | 211                    | FALSE           |
| chr2              | 164794060         | 164794160       | 101                    | FALSE           |
| chr2              | 181652014         | 181652818       | 805                    | TRUE            |
| chr2              | 181652014         | 181652818       | 805                    | TRUE            |
| chr2              | 181652014         | 181652818       | 805                    | TRUE            |
| chr2              | 181665130         | 181665729       | 600                    | TRUE            |

| <b>Chromosome</b> | <b>Peak start</b> | <b>Peak end</b> | <b>Peak width (bp)</b> | <b>In input</b> |
|-------------------|-------------------|-----------------|------------------------|-----------------|
| chr2              | 181665130         | 181665729       | 600                    | TRUE            |
| chr3              | 5860569           | 5860868         | 300                    | TRUE            |
| chr3              | 5860569           | 5860868         | 300                    | TRUE            |
| chr3              | 8245754           | 8246603         | 850                    | TRUE            |
| chr3              | 8245754           | 8246603         | 850                    | TRUE            |
| chr3              | 8245754           | 8246603         | 850                    | TRUE            |
| chr3              | 56379314          | 56379744        | 431                    | TRUE            |
| chr3              | 56379314          | 56379744        | 431                    | TRUE            |
| chr3              | 56379314          | 56379744        | 431                    | TRUE            |
| chr3              | 56379314          | 56379744        | 431                    | TRUE            |
| chr3              | 99785033          | 99785316        | 284                    | TRUE            |
| chr4              | 3016622           | 3018387         | 1766                   | TRUE            |
| chr4              | 3016622           | 3018387         | 1766                   | TRUE            |
| chr4              | 3016622           | 3018387         | 1766                   | TRUE            |
| chr4              | 21639564          | 21639635        | 72                     | FALSE           |
| chr4              | 28104023          | 28104197        | 175                    | TRUE            |
| chr4              | 64158840          | 64159150        | 311                    | TRUE            |
| chr4              | 64158840          | 64159150        | 311                    | TRUE            |
| chr4              | 70039090          | 70039358        | 269                    | TRUE            |
| chr4              | 79648396          | 79651153        | 2758                   | TRUE            |
| chr5              | 7276770           | 7277009         | 240                    | TRUE            |
| chr5              | 115372382         | 115372654       | 273                    | TRUE            |
| chr5              | 115372382         | 115372654       | 273                    | TRUE            |
| chr5              | 115372382         | 115372654       | 273                    | TRUE            |
| chr5              | 147072509         | 147072968       | 460                    | TRUE            |
| chr5              | 147072509         | 147072968       | 460                    | TRUE            |
| chr6              | 3151399           | 3151612         | 214                    | TRUE            |
| chr6              | 9840054           | 9840216         | 163                    | TRUE            |
| chr6              | 48071227          | 48071390        | 164                    | TRUE            |
| chr6              | 79768041          | 79768360        | 320                    | TRUE            |
| chr6              | 79768041          | 79768360        | 320                    | TRUE            |
| chr6              | 103598999         | 103599287       | 289                    | TRUE            |
| chr6              | 121423177         | 121423379       | 203                    | FALSE           |
| chr6              | 136752829         | 136753076       | 248                    | TRUE            |
| chr7              | 7230792           | 7230996         | 205                    | TRUE            |
| chr7              | 88638379          | 88638443        | 65                     | FALSE           |
| chr7              | 89920145          | 89920590        | 446                    | TRUE            |
| chr7              | 118940974         | 118941162       | 189                    | TRUE            |
| chr8              | 14072623          | 14072825        | 203                    | FALSE           |
| chr8              | 19784504          | 19784991        | 488                    | TRUE            |
| chr8              | 20020262          | 20020528        | 267                    | TRUE            |
| chr8              | 24205893          | 24206328        | 436                    | TRUE            |

| <b>Chromosome</b> | <b>Peak start</b> | <b>Peak end</b> | <b>Peak width (bp)</b> | <b>In input</b> |
|-------------------|-------------------|-----------------|------------------------|-----------------|
| chr8              | 24205893          | 24206328        | 436                    | TRUE            |
| chr8              | 127317183         | 127317380       | 198                    | FALSE           |
| chr9              | 2999946           | 3001152         | 1207                   | TRUE            |
| chr9              | 3002908           | 3003075         | 168                    | TRUE            |
| chr9              | 3005825           | 3006009         | 185                    | TRUE            |
| chr9              | 3015212           | 3015406         | 195                    | TRUE            |
| chr9              | 3015644           | 3015808         | 165                    | TRUE            |
| chr9              | 3016025           | 3016407         | 383                    | TRUE            |
| chr9              | 3018714           | 3019517         | 804                    | TRUE            |
| chr9              | 3025313           | 3026171         | 859                    | FALSE           |
| chr9              | 3026262           | 3027857         | 1596                   | TRUE            |
| chr9              | 3030097           | 3030318         | 222                    | TRUE            |
| chr9              | 3031825           | 3032769         | 945                    | TRUE            |
| chr9              | 3035658           | 3036643         | 986                    | TRUE            |
| chr9              | 15123942          | 15124316        | 375                    | TRUE            |
| chr9              | 24346388          | 24346665        | 278                    | TRUE            |
| chr9              | 24346388          | 24346665        | 278                    | TRUE            |
| chr9              | 24346388          | 24346665        | 278                    | TRUE            |
| chr9              | 24549507          | 24549705        | 199                    | TRUE            |
| chr9              | 35112718          | 35113179        | 462                    | TRUE            |
| chr9              | 86916747          | 86916747        | 1                      | FALSE           |
| chr9              | 108729231         | 108729531       | 301                    | FALSE           |
| chr9              | 123371015         | 123371328       | 314                    | TRUE            |
| chr9              | 123782164         | 123782369       | 206                    | TRUE            |
| chrX              | 73843981          | 73844520        | 540                    | TRUE            |
| chrX              | 73843981          | 73844520        | 540                    | TRUE            |
| chrX              | 109484283         | 109484882       | 600                    | TRUE            |
| chrX              | 109484283         | 109484882       | 600                    | TRUE            |
| chrX              | 139917495         | 139917705       | 211                    | TRUE            |
| chrX              | 139917495         | 139917705       | 211                    | TRUE            |
| chrY              | 2765733           | 2765870         | 138                    | FALSE           |

Most of these genomic sites hereafter designated as flagged regions are also enriched in other publically available control and experimental ChIP datasets. True indicates whether the given genomic locus is equally enriched in input sample. False indicates that the region is enriched in affinity based control and experimental ChIP but not in the input genomic DNA.
