# Supplementary material
Source: PubMed Central journal article supplement (PMC4058862)

# Figure S1

**a**

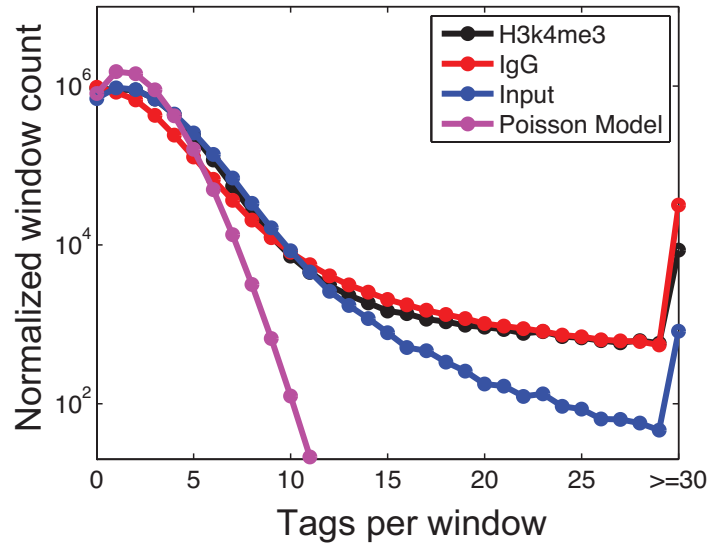

**b**

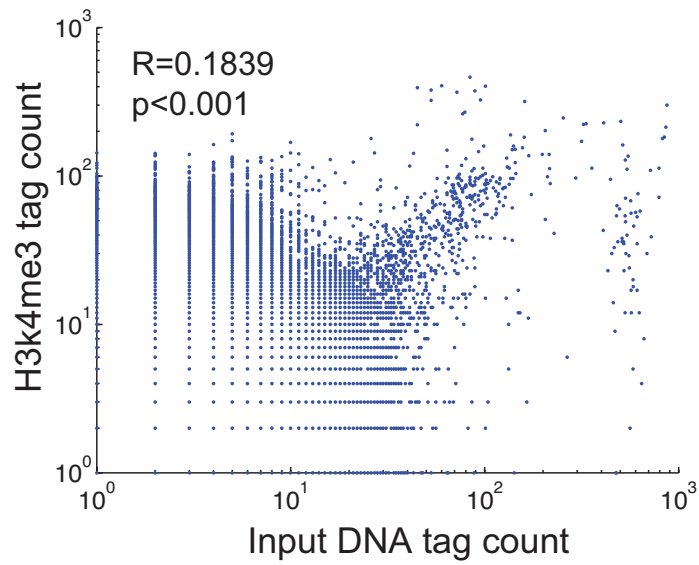

**c**

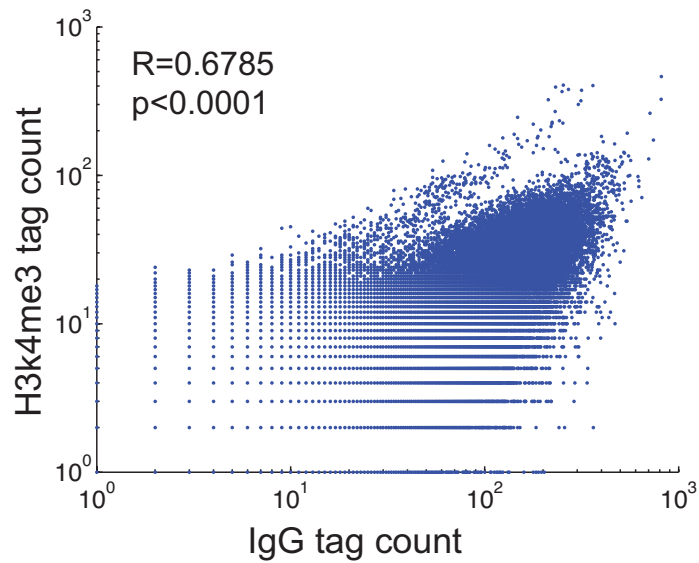

Supplement: NIHMS591325-supplement-Supplementary_Figure_S1.pdf [file NIHMS591325-supplement-Supplementary_Figure_S1.pdf]

# Figure S2

Muscle cells (ChIP-seq peaks)

ENCODE project (ChIP-seq peaks) various tissues

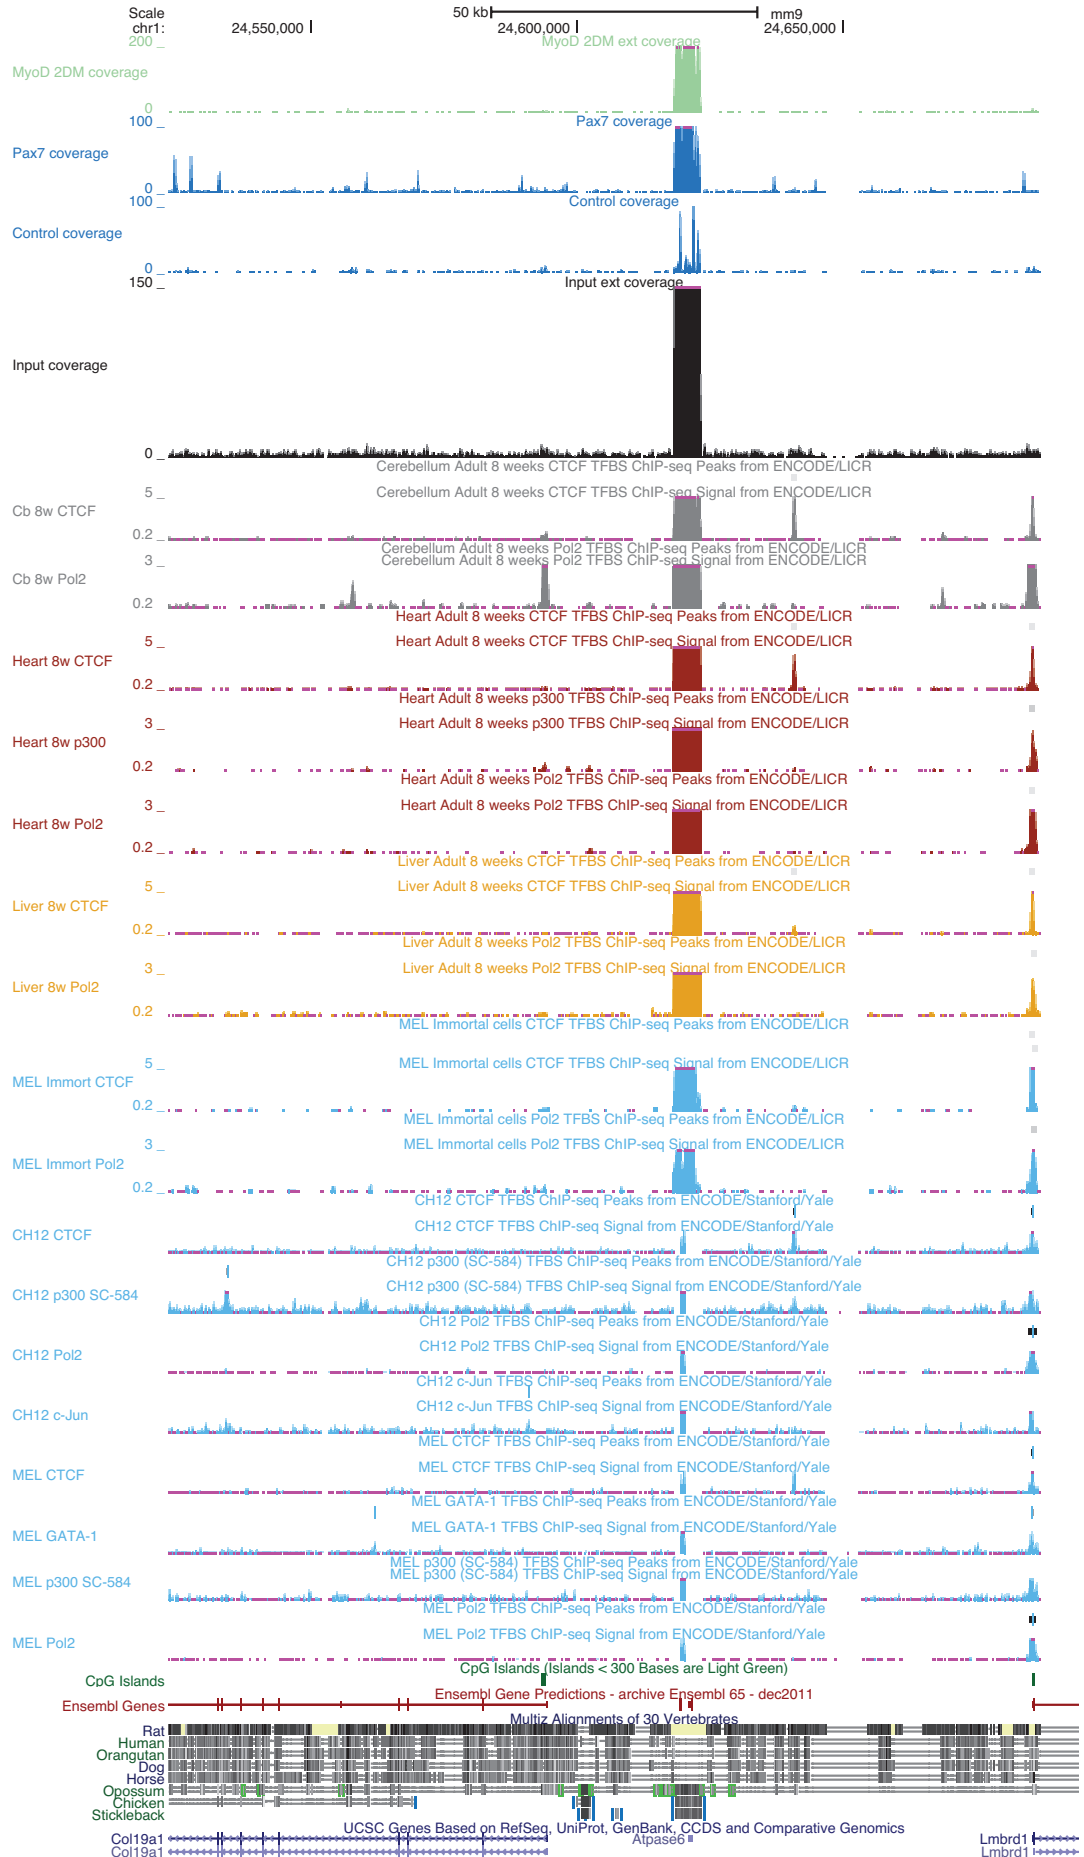

Supplement: NIHMS591325-supplement-Supplementary_Figure_S2.pdf [file NIHMS591325-supplement-Supplementary_Figure_S2.pdf]
